# Supplementary material for: Environmentally Friendly Valorization of Solieria filiformis (Gigartinales, Rhodophyta) from IMTA Using a Biorefinery Concept
Source: PubMed Central journal article supplement (PMC6315615; doi:10.3390/md16120487), 2018-12-06

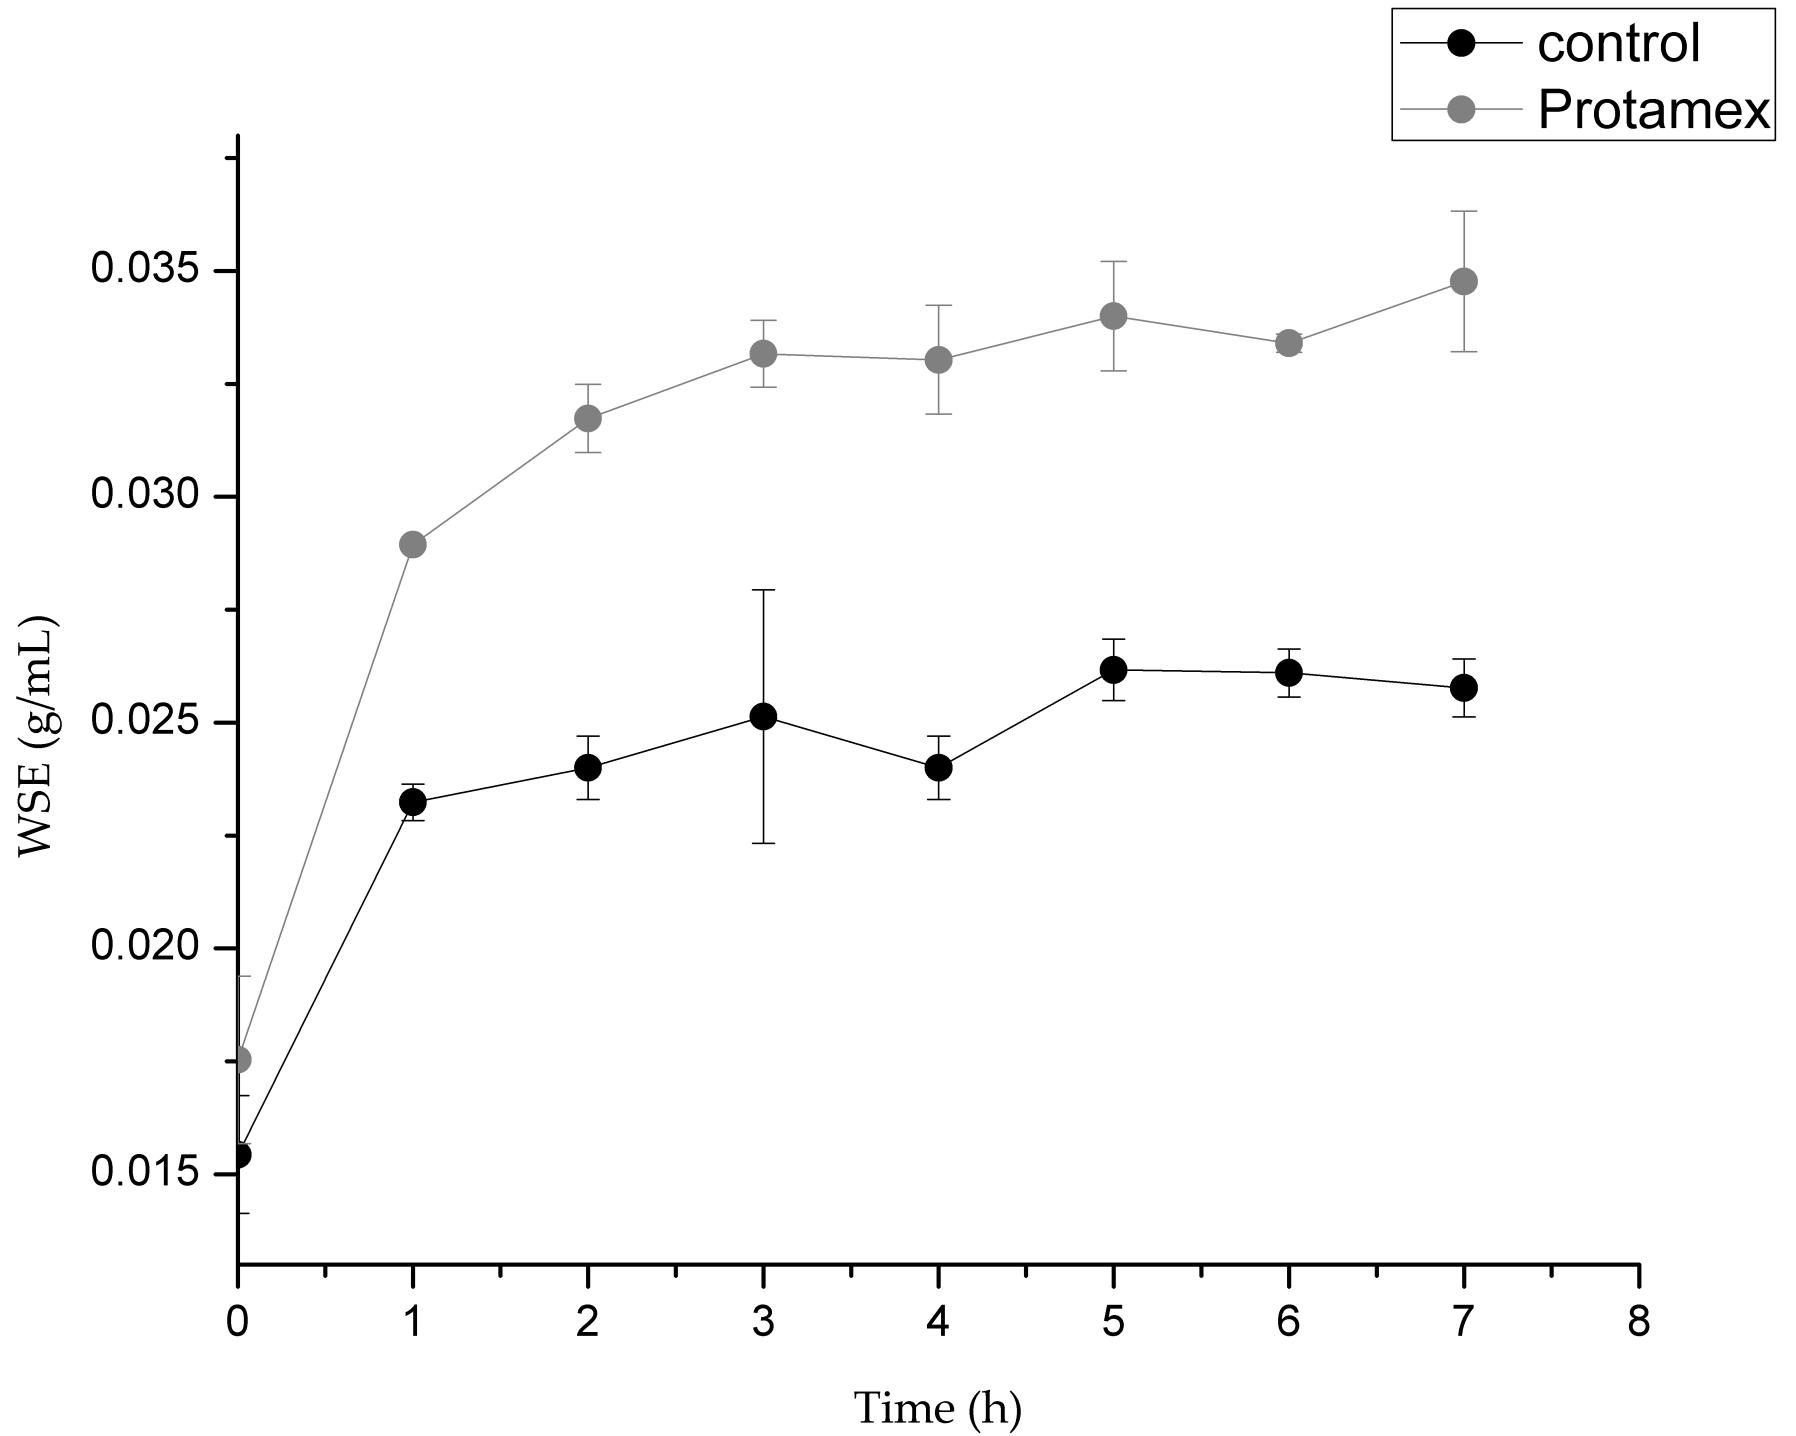

Supplement: marinedrugs-16-00487-s001.pdf [file marinedrugs-16-00487-s001.pdf]
